# Supplementary material for: Bioavailability of the ferulic acid-derived phenolic compounds of a rice bran enzymatic extract and their activity against superoxide production
Source: Royal Society of Chemistry journal article supplement (doi:10.1039/c7fo00243b), 2017-01-01
Supplement: c7fo00243b1.pdf [file c7fo00243b1.pdf]

**Supplementary Table 1S.** Optimized SRM conditions used for the quantification and identification for the analysis of ferulic acid-derived phenolic compounds and their generated metabolites, and the standard compound used for its quantification or tentative quantification by UPLC-MS/MS.

**Supplementary Table 2S.** Instrumental quality parameters of the methods for the determination of phenolic compounds and their generated metabolites in a) plasma, b) urine, and c) faeces samples.

**Supplementary Table 3S.** Time-course concentrations ( $\mu\text{mol/L}$ ) of the phenolic metabolites found in plasma after oral gavage of rice bran enzymatic extract.
