# Supplementary material for: Bioavailability of the ferulic acid-derived phenolic compounds of a rice bran enzymatic extract and their activity against superoxide production
Source: Royal Society of Chemistry journal article supplement (doi:10.1039/c7fo00243b), 2017-01-01
Supplement: c7fo00243b2.pdf [file c7fo00243b2.pdf]

## Supplementary data

**Table 1S.** Optimized SRM conditions used for quantification and identification for the analysis of ferulic acid-derived phenolic compounds and their generated metabolites, and the standard compound used for its quantification or tentative quantification by UPLC–MS/MS.

| Phenolic compound                         | Quantification |                  |                       | Identification |                  |                       | MS <sup>2</sup> fragments | Standard used for its (tentative) quantification |
|-------------------------------------------|----------------|------------------|-----------------------|----------------|------------------|-----------------------|---------------------------|--------------------------------------------------|
|                                           | SRM            | Cone voltage (V) | Collision energy (eV) | SRM            | Cone voltage (V) | Collision energy (eV) |                           |                                                  |
| Catechol                                  | 108.9>90.9     | 40               | 15                    | -              | -                | -                     | 90.9                      | Catechol                                         |
| Methyl catechol                           | 123>109        | 40               | 15                    | -              | -                | -                     | 109                       | Catechol                                         |
| Catechol sulphate                         | 189>109        | 40               | 15                    | -              | -                | -                     | 109                       | Catechol                                         |
| Catechol glucuronide                      | 285>109        | 40               | 15                    | -              | -                | -                     | 109                       | Catechol                                         |
| Methyl catechol sulphate                  | 203>123        | 40               | 15                    | 203>109        | 40               | 20                    | 123, 109                  | Catechol                                         |
| Methyl catechol glucuronide               | 299>123        | 40               | 15                    | 299>109        | 40               | 20                    | 123, 109                  | Catechol                                         |
| Hydroxybenzoic acid                       | 137>93         | 30               | 15                    | -              | -                | -                     | 93                        | <i>p</i> -Hydroxybenzoic acid                    |
| Hydroxybenzoic acid sulphate              | 217>137        | 35               | 15                    | 217>93         | 35               | 20                    | 137, 93                   | <i>p</i> -Hydroxybenzoic acid                    |
| Hydroxybenzoic acid glucuronide           | 313>137        | 35               | 15                    | 313>93         | 35               | 20                    | 137, 93                   | <i>p</i> -Hydroxybenzoic acid                    |
| Protocatechuic acid                       | 153>109        | 40               | 15                    | -              | -                | -                     | 109                       | Protocatechuic acid                              |
| Protocatechuic acid sulphate              | 233>153        | 40               | 15                    | 233>109        | 40               | 20                    | 153, 109                  | Protocatechuic acid                              |
| Protocatechuic acid glucuronide           | 329>153        | 40               | 20                    | 329>109        | 40               | 25                    | 153, 109                  | Protocatechuic acid                              |
| Hydroxytyrosol                            | 153>123        | 35               | 15                    | 153>95         | 35               | 25                    | 123, 95                   | Hydroxytyrosol                                   |
| Hydroxytyrosol sulphate                   | 233>153        | 35               | 15                    | 233>123        | 35               | 20                    | 153, 123                  | Hydroxytyrosol                                   |
| Hydroxytyrosol glucuronide                | 329>153        | 35               | 15                    | 329>123        | 35               | 20                    | 153, 123                  | Hydroxytyrosol                                   |
| Phenylacetic acid                         | 135>91         | 20               | 5                     | -              | -                | -                     | 91                        | Phenylacetic acid                                |
| <i>p</i> -Hydroxyphenylacetic acid        | 151>107        | 20               | 10                    | -              | -                | -                     | 107                       | <i>p</i> -Hydroxyphenylacetic acid               |
| <i>m</i> -Hydroxyphenylacetic acid        | 151>107        | 20               | 10                    | -              | -                | -                     | 107                       | <i>p</i> -Hydroxyphenylacetic acid               |
| <i>o</i> -Hydroxyphenylacetic acid        | 151>107        | 20               | 10                    | -              | -                | -                     | 107                       | <i>p</i> -Hydroxyphenylacetic acid               |
| Hydroxyphenylacetic acid sulphate         | 231>151        | 40               | 15                    | 231>107        | 40               | 20                    | 151, 107                  | <i>p</i> -Hydroxyphenylacetic acid               |
| Hydroxyphenylacetic acid glucuronide      | 327>151        | 40               | 15                    | 327>107        | 40               | 20                    | 151, 107                  | <i>p</i> -Hydroxyphenylacetic acid               |
| Dihydroxyphenylacetic acid                | 167>123        | 20               | 10                    | 167>108        | 20               | 20                    | 123, 108                  | 3,4-Dihydroxyphenylacetic acid                   |
| Dihydroxyphenylacetic acid sulphate       | 247>167        | 35               | 15                    | 247>123        | 35               | 25                    | 167, 123, 108             | 3,4-Dihydroxyphenylacetic acid                   |
| Dihydroxyphenylacetic acid glucuronide    | 343>167        | 40               | 25                    | 343>123        | 40               | 30                    | 167, 123, 108             | 3,4-Dihydroxyphenylacetic acid                   |
| Phenylpropionic acid                      | 149>105        | 20               | 5                     | -              | -                | -                     | 105                       | 3-(4-Hydroxyphenyl)propionic acid                |
| Hydroxyphenylpropionic acid               | 165>121        | 20               | 10                    | -              | -                | -                     | 121                       | 3-(4-Hydroxyphenyl)propionic acid                |
| Hydroxyphenylpropionic acid sulphate      | 245>165        | 35               | 15                    | 245>121        | 35               | 20                    | 165, 121                  | 3-(4-Hydroxyphenyl)propionic acid                |
| Hydroxyphenylpropionic acid glucuronide   | 341>165        | 40               | 25                    | 341>121        | 40               | 30                    | 165, 121                  | 3-(4-Hydroxyphenyl)propionic acid                |
| Dihydroxyphenylpropionic acid             | 181>137        | 20               | 15                    | -              | -                | -                     | 137                       | 3-(2,4-Dihydroxyphenyl)propionic acid            |
| Dihydroxyphenylpropionic acid sulphate    | 261>181        | 40               | 15                    | 261>137        | 40               | 25                    | 181, 137, 109             | 3-(2,4-Dihydroxyphenyl)propionic acid            |
| Dihydroxyphenylpropionic acid glucuronide | 357>181        | 40               | 10                    | 357>137        | 40               | 20                    | 181, 137, 109             | 3-(2,4-Dihydroxyphenyl)propionic acid            |
| Vanillic acid                             | 167>123        | 30               | 10                    | 167>152        | 30               | 15                    | 152, 123                  | Vanillic acid                                    |
| Vanillic acid sulphate                    | 247>167        | 40               | 10                    | 247>123        | 40               | 15                    | 167, 152, 123             | Vanillic acid                                    |
| Vanillic acid glucuronide                 | 343>167        | 40               | 10                    | 343>123        | 40               | 15                    | 167, 152, 123             | Vanillic acid                                    |
| Homovanillic acid                         | 181>137        | 25               | 10                    | 181>122        | 25               | 20                    | 137, 122, 105             | Vanillic acid                                    |
| Homovanillic acid sulphate                | 261>181        | 40               | 15                    | 261>137        | 40               | 25                    | 181, 137, 122, 105        | Vanillic acid                                    |
| Homovanillic acid glucuronide             | 357>181        | 40               | 20                    | 357>137        | 40               | 25                    | 181, 137, 122, 105        | Vanillic acid                                    |
| Caffeic acid                              | 179>135        | 35               | 10                    | 179>117        | 35               | 15                    | 135, 117                  | Caffeic acid                                     |

|                                 |         |    |    |         |    |    |                    |                         |
|---------------------------------|---------|----|----|---------|----|----|--------------------|-------------------------|
| Caffeic acid sulphate           | 259>179 | 35 | 15 | 259>135 | 35 | 20 | 179, 135           | Caffeic acid            |
| Caffeic acid glucuronide        | 355>179 | 40 | 15 | 355>135 | 40 | 20 | 179, 135           | Caffeic acid            |
| Coumaric acid                   | 163>119 | 35 | 10 | 163>93  | 35 | 20 | 119, 93            | <i>p</i> -Coumaric acid |
| Coumaric acid sulphate          | 243>163 | 35 | 15 | 243>119 | 35 | 20 | 163, 119           | <i>p</i> -Coumaric acid |
| Coumaric acid glucuronide       | 339>163 | 35 | 15 | 339>119 | 35 | 20 | 163, 119           | <i>p</i> -Coumaric acid |
| Ferulic acid                    | 193>134 | 30 | 15 | 193>178 | 30 | 20 | 178, 134           | Ferulic acid            |
| Ferulic acid sulphate           | 273>193 | 35 | 15 | 273>134 | 35 | 20 | 193, 178, 149, 134 | Ferulic acid            |
| Ferulic acid glucuronide        | 369>193 | 35 | 15 | 369>134 | 35 | 20 | 193, 178, 149, 134 | Ferulic acid            |
| Dihydroferulic acid             | 195>136 | 35 | 10 | 195>151 | 35 | 15 | 177, 151, 136, 123 | Ferulic acid            |
| Dihydroferulic acid sulphate    | 275>195 | 35 | 15 | 275>136 | 35 | 20 | 195, 151, 136      | Ferulic acid            |
| Dihydroferulic acid glucuronide | 371>195 | 35 | 20 | 371>136 | 35 | 25 | 195, 151, 136      | Ferulic acid            |
| Huppuric acid                   | 178>134 | 40 | 10 | 178>77  | 40 | 20 | 134, 77            | Caffeic acid            |
| Hydroxyhippuric acid            | 194>100 | 40 | 10 | 194>93  | 40 | 15 | 100, 93            | Caffeic acid            |

MS<sup>2</sup> fragments: MS<sup>2</sup> daughter ions produced from [M-H]<sup>-</sup> fragmentation
