# Supplementary material for: Bioavailability of the ferulic acid-derived phenolic compounds of a rice bran enzymatic extract and their activity against superoxide production
Source: Royal Society of Chemistry journal article supplement (doi:10.1039/c7fo00243b), 2017-01-01
Supplement: c7fo00243b3.pdf [file c7fo00243b3.pdf]

## Supplementary Data

**Table 2S.** Instrumental quality parameters for the determination of phenolic compounds in plasma, urine and faeces samples.

### a) Plasma samples

| Phenolic compound                     | %R | %ME  | Linearity ( $\mu\text{M}$ ) | Calibration curve      | %RSD ( $n=3$ )     |                   | % Accuracy ( $n=3$ ) | LOQ (nM) | LOD (nM) |
|---------------------------------------|----|------|-----------------------------|------------------------|--------------------|-------------------|----------------------|----------|----------|
|                                       |    |      |                             |                        | 0.01 $\mu\text{M}$ | 0.1 $\mu\text{M}$ | 0.1 $\mu\text{M}$    |          |          |
| Catechol                              | 89 | 6.2  | 0.1-15                      | $y = 312.28x + 81.704$ | 6.6 <sup>a)</sup>  | 5.4 <sup>b)</sup> | 101 <sup>b)</sup>    | 100      | 30       |
| <i>p</i> -Hydroxybenzoic acid         | 92 | 7.4  | 0.003-7                     | $y = 19452x + 904.83$  | 5.6                | 4.2               | 98                   | 3        | 1        |
| Vanillic acid                         | 85 | 7.1  | 0.008-8                     | $y = 7436.9x + 1559.8$ | 6.9                | 6.0               | 96                   | 8        | 3        |
| <i>p</i> -Coumaric acid               | 82 | 6.5  | 0.009-9                     | $y = 15275x + 179.85$  | 6.5                | 5.4               | 101                  | 9        | 3        |
| Ferulic acid                          | 86 | 8.1  | 0.003-6                     | $y = 24400x + 811.5$   | 6.0                | 5.1               | 98                   | 3        | 1        |
| Caffeic acid                          | 80 | 9.2  | 0.007-10                    | $y = 19788x - 1218.8$  | 6.6                | 5.2               | 103                  | 7        | 2        |
| Phenylacetic acid                     | 79 | 10.5 | 0.004-20                    | $y = 9930.3x + 6537.5$ | 6.3                | 5.2               | 102                  | 4        | 1        |
| 4-Hydroxyphenylacetic acid            | 89 | 9.3  | 0.008-16                    | $y = 4124.1x + 1610.9$ | 5.5                | 6.4               | 99                   | 8        | 3        |
| 3,4-Dihydroxyphenylacetic acid        | 82 | 8.9  | 0.5-15                      | $y = 184x - 65.852$    | 6.8 <sup>c)</sup>  | 6.8 <sup>d)</sup> | 6.8 <sup>d)</sup>    | 500      | 220      |
| 3-(4-Hydroxyphenyl)propionic acid     | 81 | 9.6  | 0.002-13                    | $y = 2889.4x + 855.97$ | 7.0                | 6.1               | 103                  | 2        | 0.7      |
| 3-(2,4-Dihydroxyphenyl)propionic acid | 79 | 10.8 | 0.01-10                     | $y = 11106x + 254.11$  | 6.7 <sup>a)</sup>  | 6.2 <sup>b)</sup> | 104 <sup>b)</sup>    | 10       | 3        |

a) 0.2  $\mu\text{M}$ , b) 2  $\mu\text{M}$ , c) 1.0  $\mu\text{M}$  d) 10  $\mu\text{M}$

### b) Urine samples

| Phenolic compound                  | %R | %ME  | Linearity ( $\mu\text{M}$ ) | Calibration curve      | %RSD ( $n=3$ )     |                   | % Accuracy ( $n=3$ ) | LOQ (nM) | LOD (nM) |
|------------------------------------|----|------|-----------------------------|------------------------|--------------------|-------------------|----------------------|----------|----------|
|                                    |    |      |                             |                        | 0.01 $\mu\text{M}$ | 0.1 $\mu\text{M}$ | 0.1 $\mu\text{M}$    |          |          |
| Catechol                           | 86 | 8.0  | 2-520                       | $y = 30.034x + 405.19$ | 6.2 <sup>a)</sup>  | 5.8 <sup>b)</sup> | 103 <sup>b)</sup>    | 2000     | 680      |
| <i>p</i> -Hydroxybenzoic acid      | 89 | 6.2  | 0.01-250                    | $y = 1350.1x + 4176.8$ | 5.0                | 4.6               | 102                  | 10       | 3        |
| Protocatechuic acid                | 85 | 8.6  | 0.06-125                    | $y = 320.32x + 102.12$ | 5.9                | 5.2               | 97                   | 60       | 20       |
| Phenylacetic acid                  | 82 | 9.2  | 0.06-700                    | $y = 741.01x + 11279$  | 6.0                | 5.4               | 98                   | 60       | 20       |
| <i>p</i> -Hydroxyphenylacetic acid | 84 | 10.6 | 0.1-500                     | $y = 63.66x + 5652.6$  | 7.7 <sup>c)</sup>  | 6.4 <sup>d)</sup> | 105 <sup>d)</sup>    | 100      | 35       |
| Dihydroxyphenylacetic acid         | 86 | 6.8  | 0.5-110                     | $y = 50.898x - 161.89$ | 6.4                | 5.8               | 105                  | 500      | 170      |
| Hydroxyphenylpropionic acid        | 80 | 6.0  | 0.19-475                    | $y = 155.92x + 2152.8$ | 6.6 <sup>e)</sup>  | 5.9 <sup>f)</sup> | 105 <sup>f)</sup>    | 300      | 100      |
| Vanillic acid                      | 79 | 11.6 | 0.3-120                     | $y = 376.08x + 1099.7$ | 7.2 <sup>e)</sup>  | 6.6 <sup>f)</sup> | 98 <sup>f)</sup>     | 300      | 100      |
| Caffeic acid                       | 82 | 8.9  | 0.05-260                    | $y = 2490.6x - 1341.6$ | 6.8                | 5.9               | 101                  | 50       | 20       |
| <i>p</i> -Coumaric acid            | 86 | 7.0  | 0.03-320                    | $y = 1215.1x + 5836.6$ | 6.2                | 5.6               | 104                  | 30       | 10       |
| Ferulic acid                       | 88 | 9.4  | 0.02-220                    | $y = 1191x + 2301.7$   | 5.5                | 5.2               | 101                  | 20       | 7        |

a) 10  $\mu\text{M}$ , b) 100  $\mu\text{M}$ , c) 0.2  $\mu\text{M}$ , d) 2  $\mu\text{M}$ , e) 0.5  $\mu\text{M}$ , f) 50  $\mu\text{M}$ ,

### c) Faeces samples

| Phenolic compound             | %R | %ME  | Linearity<br>( $\mu\text{mol/g dry}$ ) | Calibration curve      | %RSD (n=3)         |                   | % Accuracy (n=3)  | LOQ<br>(nmol/g dry) | LOD<br>(nmol/g dry) |
|-------------------------------|----|------|----------------------------------------|------------------------|--------------------|-------------------|-------------------|---------------------|---------------------|
|                               |    |      |                                        |                        | 0.01 $\mu\text{M}$ | 0.1 $\mu\text{M}$ | 0.1 $\mu\text{M}$ |                     |                     |
| <i>p</i> -Hydroxybenzoic acid | 86 | 7.6  | 0.05-10                                | $y = 1005.8x + 173.48$ | 7.1                | 6.5               | 97                | 50                  | 15                  |
| Protocatechuic acid           | 83 | 8.2  | 0.07-14                                | $y = 1479.6x - 376.17$ | 5.4                | 4.8               | 104               | 70                  | 25                  |
| Dihydroxyphenylacetic acid    | 80 | 8.5  | 0.10-12                                | $y = 128.04x - 14.539$ | 6.8 <sup>a)</sup>  | 5.4 <sup>b)</sup> | 103 <sup>b)</sup> | 100                 | 30                  |
| Hydroxyphenylpropionic acid   | 78 | 9.9  | 0.05-20                                | $y = 1853.6x + 565.85$ | 6.2                | 5.7               | 96                | 50                  | 30                  |
| Vanillic acid                 | 75 | 7.4  | 0.01-13                                | $y = 4070.8x + 950.26$ | 6.8                | 6.4               | 95                | 10                  | 3                   |
| Caffeic acid                  | 85 | 8.4  | 0.001-12                               | $y = 12176x + 15.551$  | 7.2                | 6.5               | 104               | 1                   | 0.3                 |
| <i>p</i> -Coumaric acid       | 79 | 10.9 | 0.01-15                                | $y = 9041x - 68.104$   | 6.2                | 5.0               | 99                | 10                  | 3                   |
| Ferulic acid                  | 80 | 6.8  | 0.005-10                               | $y = 15757x + 179.25$  | 5.0                | 4.8               | 104               | 5                   | 2                   |

<sup>a)</sup> 0.2  $\mu\text{M}$ , <sup>b)</sup> 2  $\mu\text{M}$ ,
