# Supplementary material for: Bioavailability of the ferulic acid-derived phenolic compounds of a rice bran enzymatic extract and their activity against superoxide production
Source: Royal Society of Chemistry journal article supplement (doi:10.1039/c7fo00243b), 2017-01-01
Supplement: c7fo00243b4.pdf [file c7fo00243b4.pdf]

Supplementary Data

**Table 3S.** Time-course concentrations of the phenolic metabolites found in plasma after oral gavage of rice bran enzymatic extract.

| Phenolic metabolites ( $\mu\text{mol/L}$ plasma) | Time after RBEE oral administration |                          |                         |                         |                          |                          |                         |                         |                         |
|--------------------------------------------------|-------------------------------------|--------------------------|-------------------------|-------------------------|--------------------------|--------------------------|-------------------------|-------------------------|-------------------------|
|                                                  | 0 h                                 | 15 min                   | 30 min                  | 1 h                     | 3 h                      | 6 h                      | 12 h                    | 18 h                    | 24 h                    |
| Ferulic acid                                     | n.d. <sup>d</sup>                   | 1.26±0.28 <sup>a</sup>   | 1.56±0.35 <sup>a</sup>  | 0.57±0.08 <sup>b</sup>  | 0.38±0.07 <sup>bc</sup>  | 0.08±0.01 <sup>cd</sup>  | 0.45±0.05 <sup>b</sup>  | 0.00±0.0 <sup>d</sup>   | n.d. <sup>d</sup>       |
| Isoferulic acid                                  | n.d. <sup>b</sup>                   | 0.05±0.03 <sup>b</sup>   | 0.25±0.19 <sup>a</sup>  | 0.01±0.00 <sup>b</sup>  | 0.00±0.00 <sup>b</sup>   | 0.00±0.00 <sup>b</sup>   | 0.03±0.01 <sup>b</sup>  | n.d. <sup>b</sup>       | n.d. <sup>b</sup>       |
| Dihydroferulic acid                              | n.d. <sup>b</sup>                   | 0.03±0.02 <sup>b</sup>   | 0.05±0.02 <sup>b</sup>  | 0.01±0.00 <sup>b</sup>  | 0.00±0.00 <sup>b</sup>   | 0.19±0.07 <sup>a</sup>   | 0.01±0.01 <sup>b</sup>  | n.d. <sup>b</sup>       | n.d. <sup>b</sup>       |
| Ferulic acid sulphate                            | n.d. <sup>c</sup>                   | 9.61±1.11 <sup>a</sup>   | 12.49±3.95 <sup>a</sup> | 6.00±0.70 <sup>b</sup>  | 5.57±0.58 <sup>b</sup>   | 1.27±0.13 <sup>c</sup>   | 4.67±0.18 <sup>b</sup>  | 0.04±0.02 <sup>c</sup>  | n.d. <sup>c</sup>       |
| Ferulic acid glucuronide                         | n.d. <sup>c</sup>                   | 0.37±0.06 <sup>b</sup>   | 0.73±0.23 <sup>a</sup>  | 0.29±0.03 <sup>b</sup>  | 0.29±0.03 <sup>b</sup>   | 0.07±0.01 <sup>c</sup>   | 0.29±0.03 <sup>b</sup>  | n.d. <sup>c</sup>       | n.d. <sup>c</sup>       |
| Dihydroferulic acid sulphate                     | n.d. <sup>e</sup>                   | 0.69±0.13 <sup>bc</sup>  | 0.84±0.29 <sup>b</sup>  | 0.33±0.06 <sup>cd</sup> | 0.48±0.16 <sup>cd</sup>  | 1.32±0.36 <sup>a</sup>   | 0.30±0.03 <sup>de</sup> | 0.02±0.01 <sup>e</sup>  | n.d. <sup>e</sup>       |
| <i>p</i> -coumaric acid                          | n.d. <sup>d</sup>                   | 1.56±0.48 <sup>b</sup>   | 2.25±0.68 <sup>a</sup>  | 0.96±0.12 <sup>c</sup>  | 0.45±0.04 <sup>cd</sup>  | 0.04±0.01 <sup>d</sup>   | 0.48±0.08 <sup>cd</sup> | 0.00±0.00 <sup>d</sup>  | n.d. <sup>d</sup>       |
| Coumaric acid sulphate                           | 0.02±0.01 <sup>c</sup>              | 2.92±0.41 <sup>a</sup>   | 3.54±0.92 <sup>a</sup>  | 1.40±0.17 <sup>b</sup>  | 1.24±0.11 <sup>b</sup>   | 0.28±0.02 <sup>c</sup>   | 1.24±0.06 <sup>b</sup>  | 0.02±0.00 <sup>c</sup>  | 0.01±0.00 <sup>c</sup>  |
| Coumaric acid glucuronide                        | n.d. <sup>d</sup>                   | 0.02±0.00 <sup>b</sup>   | 0.05±0.01 <sup>a</sup>  | 0.01±0.00 <sup>c</sup>  | 0.01±0.00 <sup>c</sup>   | 0.00±0.00 <sup>d</sup>   | 0.01±0.00 <sup>c</sup>  | n.d. <sup>d</sup>       | n.d. <sup>d</sup>       |
| Hydroxyphenylacetic acid                         | 0.75±0.24 <sup>c</sup>              | 1.81±0.47 <sup>a</sup>   | 1.70±0.35 <sup>ab</sup> | 0.66±0.05 <sup>c</sup>  | 0.78±0.13 <sup>c</sup>   | 1.32±0.17 <sup>b</sup>   | 0.67±0.09 <sup>c</sup>  | 0.46±0.04 <sup>c</sup>  | 0.50±0.08 <sup>c</sup>  |
| Hydroxyphenylacetic acid glucuronide             | n.d. <sup>c</sup>                   | 0.99±0.28 <sup>b</sup>   | 1.39±0.62 <sup>a</sup>  | 0.47±0.22 <sup>c</sup>  | 0.00±0.00 <sup>c</sup>   | n.d. <sup>c</sup>        | n.d. <sup>c</sup>       | n.d. <sup>c</sup>       | n.d. <sup>c</sup>       |
| Dihydroxyphenylacetic acid sulphate              | 0.62±0.38 <sup>d</sup>              | 111.8±16.3 <sup>ab</sup> | 125.7±38.1 <sup>a</sup> | 92.45±16.2 <sup>b</sup> | 59.27±5.57 <sup>c</sup>  | 19.03±2.70 <sup>d</sup>  | 53.65±2.58 <sup>c</sup> | 1.71±0.28 <sup>d</sup>  | 1.44±0.21 <sup>d</sup>  |
| Dihydroxyphenylacetic acid glucuronide           | n.d. <sup>c</sup>                   | 1.66±0.18 <sup>b</sup>   | 2.51±0.73 <sup>a</sup>  | 1.20±0.16 <sup>b</sup>  | 0.82±0.22 <sup>b</sup>   | 0.64±0.17 <sup>b</sup>   | 0.82±0.21 <sup>b</sup>  | n.d. <sup>c</sup>       | n.d. <sup>c</sup>       |
| Hydroxyphenylpropionic acid sulphate             | 0.03±0.02 <sup>d</sup>              | 1.76±0.45 <sup>c</sup>   | 2.85±0.89 <sup>b</sup>  | 1.80±0.51 <sup>c</sup>  | 3.60±0.55 <sup>b</sup>   | 5.22±0.78 <sup>a</sup>   | 2.64±0.26 <sup>bc</sup> | 0.00±0.00 <sup>d</sup>  | n.d. <sup>d</sup>       |
| Dihydroxyphenylpropionic acid glucuronide        | n.d. <sup>d</sup>                   | 0.08±0.00 <sup>b</sup>   | 0.10±0.01 <sup>a</sup>  | 0.07±0.00 <sup>bc</sup> | 0.06±0.00 <sup>c</sup>   | 0.06±0.02 <sup>c</sup>   | 0.07±0.00 <sup>bc</sup> | n.d. <sup>d</sup>       | n.d. <sup>d</sup>       |
| <i>p</i> -hydroxybenzoic acid                    | n.d. <sup>d</sup>                   | 0.33±0.09 <sup>b</sup>   | 0.58±0.17 <sup>a</sup>  | 0.23±0.03 <sup>b</sup>  | 0.10±0.01 <sup>bc</sup>  | 0.11±0.03 <sup>bc</sup>  | 0.16±0.04 <sup>b</sup>  | n.d. <sup>cd</sup>      | n.d. <sup>cd</sup>      |
| Hydroxybenzoic acid                              | n.d. <sup>d</sup>                   | 3.33±0.85 <sup>c</sup>   | 5.04±1.09 <sup>b</sup>  | 3.42±0.29 <sup>c</sup>  | 4.45±0.45 <sup>bc</sup>  | 13.37±1.31 <sup>a</sup>  | 4.35±0.55 <sup>bc</sup> | 0.22±0.16 <sup>d</sup>  | n.d. <sup>d</sup>       |
| Hydroxybenzoic acid sulphate                     | n.d. <sup>c</sup>                   | 0.34±0.04 <sup>b</sup>   | 0.43±0.10 <sup>a</sup>  | 0.29±0.04 <sup>b</sup>  | 0.26±0.01 <sup>b</sup>   | 0.34±0.01 <sup>b</sup>   | 0.28±0.04 <sup>b</sup>  | 0.02±0.00 <sup>c</sup>  | 0.01±0.00 <sup>c</sup>  |
| Catechol sulphate                                | 1.22±0.09 <sup>e</sup>              | 1.95±0.31 <sup>de</sup>  | 3.87±0.94 <sup>cd</sup> | 1.25±0.25 <sup>de</sup> | 9.82±1.33 <sup>b</sup>   | 16.65±1.30 <sup>a</sup>  | 5.50±1.23 <sup>c</sup>  | 2.50±0.16 <sup>de</sup> | 2.25±0.25 <sup>de</sup> |
| Methyl catechol sulphate                         | 0.17±0.11 <sup>c</sup>              | 3.51±0.75 <sup>bc</sup>  | 6.07±2.29 <sup>bc</sup> | 2.88±0.63 <sup>bc</sup> | 23.23±16.01 <sup>a</sup> | 13.80±1.40 <sup>ab</sup> | 5.88±0.88 <sup>bc</sup> | 1.03±0.12 <sup>c</sup>  | 0.83±0.14 <sup>c</sup>  |
| Hippuric acid                                    | 0.30±0.02 <sup>c</sup>              | 0.76±0.07 <sup>b</sup>   | 0.75±0.10 <sup>b</sup>  | 0.36±0.03 <sup>c</sup>  | 0.62±0.04 <sup>b</sup>   | 0.90±0.09 <sup>a</sup>   | 0.64±0.09 <sup>b</sup>  | 0.25±0.01 <sup>c</sup>  | 0.26±0.02 <sup>c</sup>  |

n.d.: not detected

Values in a row without a common superscript letter differ significantly ( $p < 0.05$ ).
